# Supplementary material for: Study of the conformation of polyelectrolyte aggregates using coarse-grained molecular dynamics simulations
Source: Royal Society of Chemistry journal article supplement (doi:10.1039/c7sm01196b), 2017-01-01
Supplement: c7sm01196b1.pdf [file c7sm01196b1.pdf]

## Supplementary Information: Study of the conformation of polyelectrolyte aggregates using coarse-grained molecular dynamics simulations

Toshiki MIMA,<sup>a</sup> Tomoyuki KINJO, Shunsuke YAMAKAWA, and Ryoji ASAHI

Toyota Central R&D Labs., Inc., 41-1, Yokomichi, Nagakute, Aichi, Japan.

<sup>a</sup> Corresponding author. E-mail: e1697@mosk.tytlabs.co.jp

### Estimation of the Rigidity of the Fluorocarbon Chain

A full-atom MD simulation of the single  $C_{56}F_{114}$  chain is performed for  $10^9$  steps with  $\Delta t = 1$  fs and  $T = 300$  K. The TEAM force field software<sup>1</sup> is used to set the parameters for the two-body Lennard-Jones 12-6 potential energy, and three-body and four-body COMPASS-type potential energy<sup>2</sup>. The center of mass of a coarse-grained particle composed of four neighboring carbon atoms and fluorine atoms bonded to the carbon atoms is calculated, and a histogram of the bond angles among three neighboring coarse-grained particles is then monitored. Finally, the histogram is converted into the effective potential energy using the following equation<sup>3</sup>:

$U_{\text{eff}}(\cos \theta) = -k_B T \ln P(\cos \theta)$ . Figure S1 shows the effective potential energy, where the minimum value is observed at  $\cos \theta = -1$ , which corresponds that the bond angle takes  $\theta = 180^\circ$  most frequently. The effective potential energy increases with the decrease of the bond angle. The cosine-type potential energy,  $U = a(1 + \cos \theta)$  is fitted to the effective potential energy. The prefactor  $a$  is estimated to be  $4.41k_B T$ .

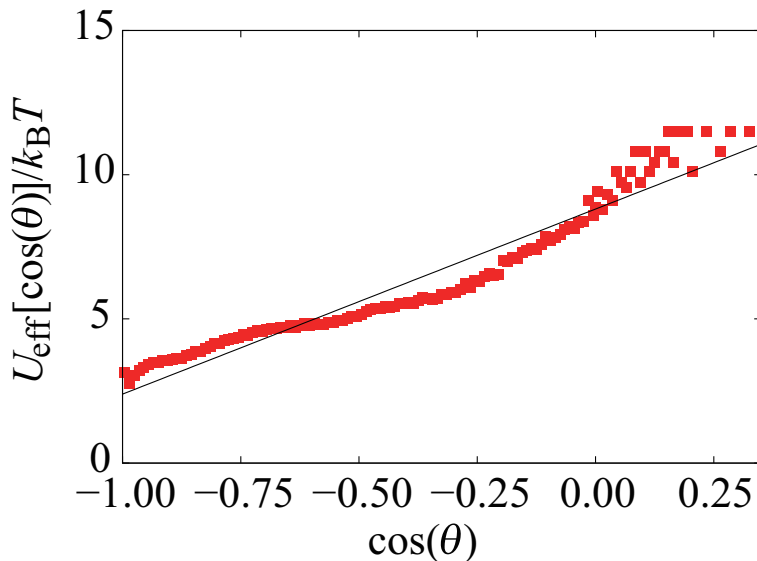

**Fig. S1** Effective potential energy of the bond angle among three neighboring coarse-grained particles. The black line represents the fitting function with a prefactor of  $4.41k_B T$ .

### References

- 1 *Direct Force Field*, Aeon Technology, Inc.: San Diego, CA 92121.
- 2 H. Sun, *J. Phys. Chem. B*, 1998, **102**, 7338–7364.
- 3 V. Harmandaris, N. Adhikari, N. F. van der Vegt and K. Kremer, *Macromolecules*, 2006, **39**, 6708–6719.
